# Supplementary material
Source: PubMed Central journal article supplement (PMC420093)
Supplement: mbc_15_6_2684__1.pdf [file mbc_15_6_2684__1.pdf]

## Supplemental Table

|             | % Co-localization<br>with Marker protein |                 | % Co-localization<br>with CFTR |
|-------------|------------------------------------------|-----------------|--------------------------------|
| CFTR (4 h)  | 25.7                                     | EEA1            | 95.9                           |
| CFTR (20 h) | 17.2                                     | EEA1            | 95.8                           |
| CFTR (1 h)  | 27.6                                     | Dextran (1 h)   | 58.4                           |
| CFTR (4 h)  | 9.2                                      | Dextran (1+3 h) | 9.3                            |
| CFTR (4 h)  | 15.5                                     | Transferrin     | 18.7                           |
| CFTR (20 h) | 12.8                                     | Adaptin         | 17.9                           |
| CFTR (22 h) | 19.9                                     | RhoB            | 39.0                           |
| CFTR (24 h) | 30.1                                     | Lysotracker     | 30.7                           |

### Supplemental Table 1.

#### Quantification of Co-localization of CFTR with different intracellular markers as shown in Figure 3.

The co-localization of CFTR with sub-cellular marker proteins as shown in Figure 3 was quantified as described by Setiadi et al. (1998). Briefly the green and red images were converted to binary images. Pixels were then counted using the ImageJ 1.30v software (Wayne Rasband, National Institutes of Health, Bethesda, MD, <http://rsb.info.nih.gov/ij/>) in individual panels and a panel created by multiplying them.
