# Supplementary material
Source: PubMed Central journal article supplement (PMC420093)

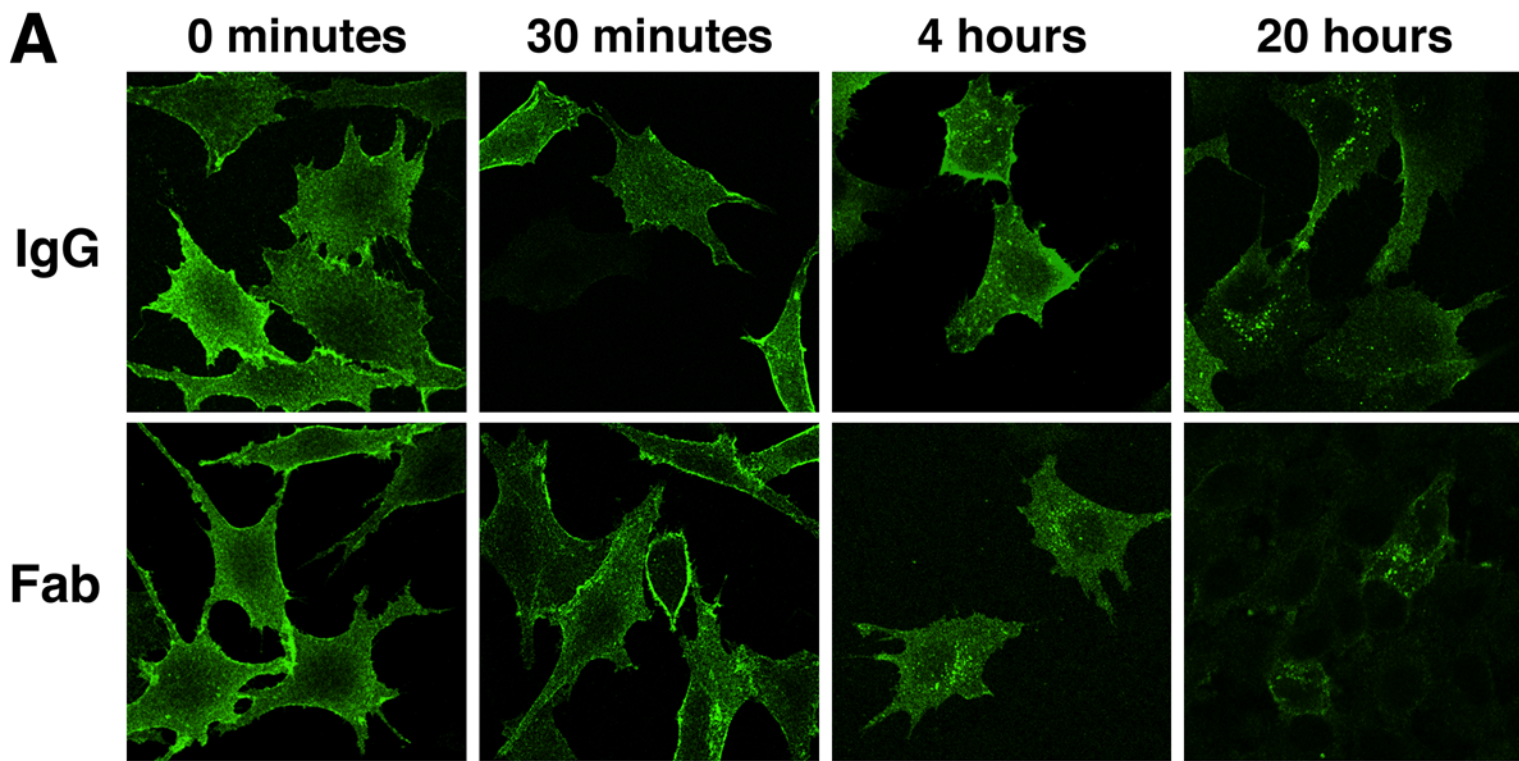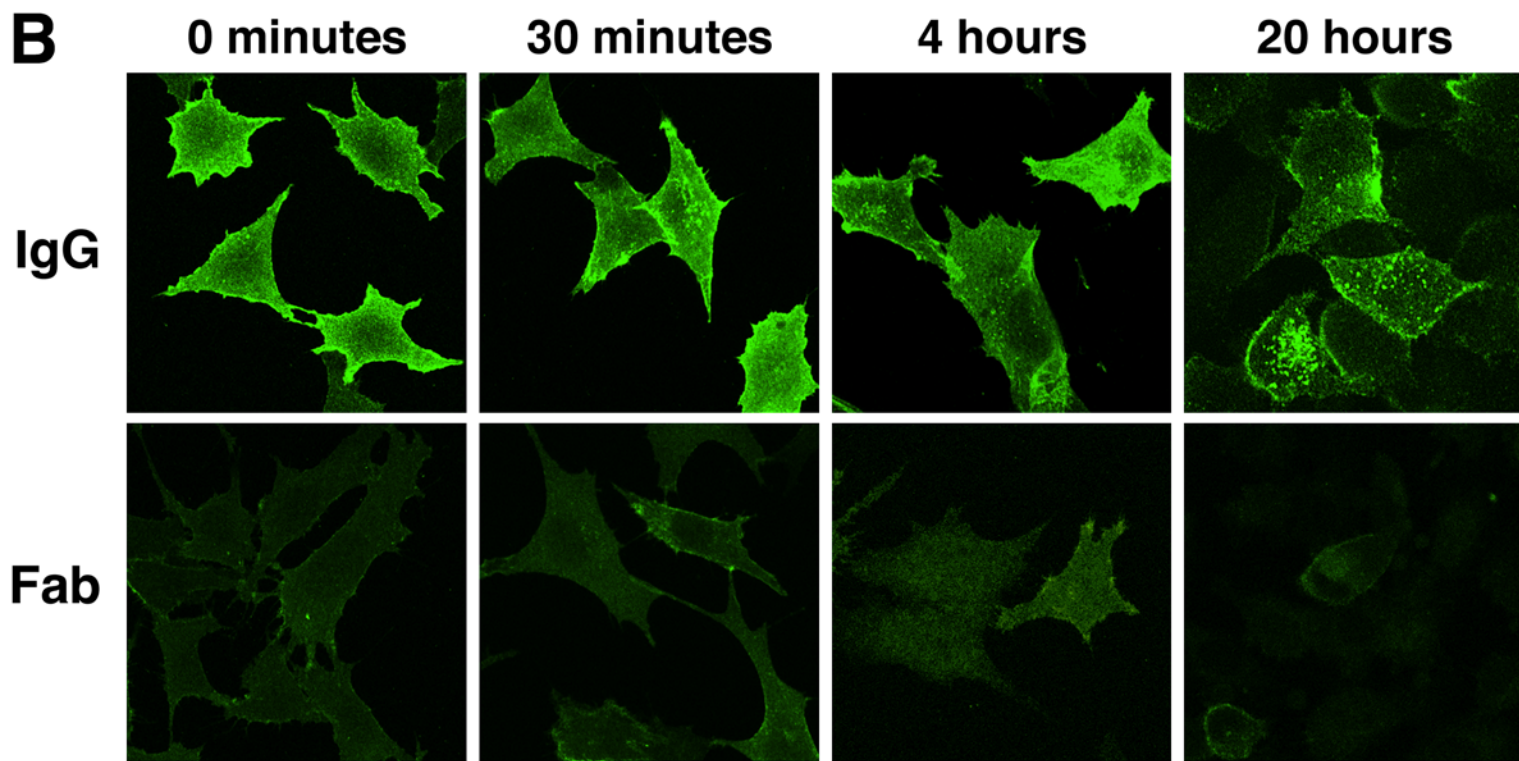

Supplement: mbc_15_6_2684__2.pdf [file mbc_15_6_2684__2.pdf]

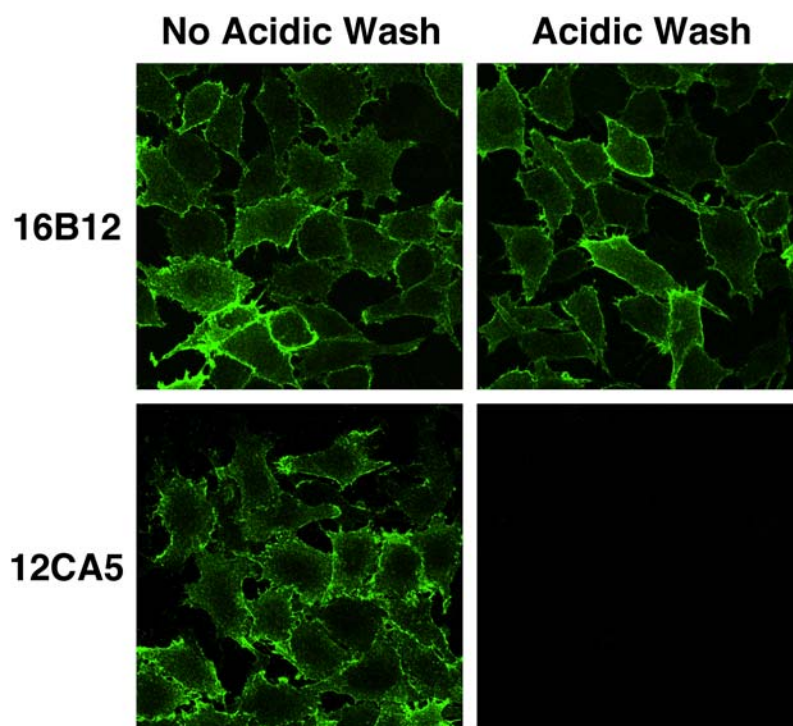

Supplement: mbc_15_6_2684__3.pdf [file mbc_15_6_2684__3.pdf]

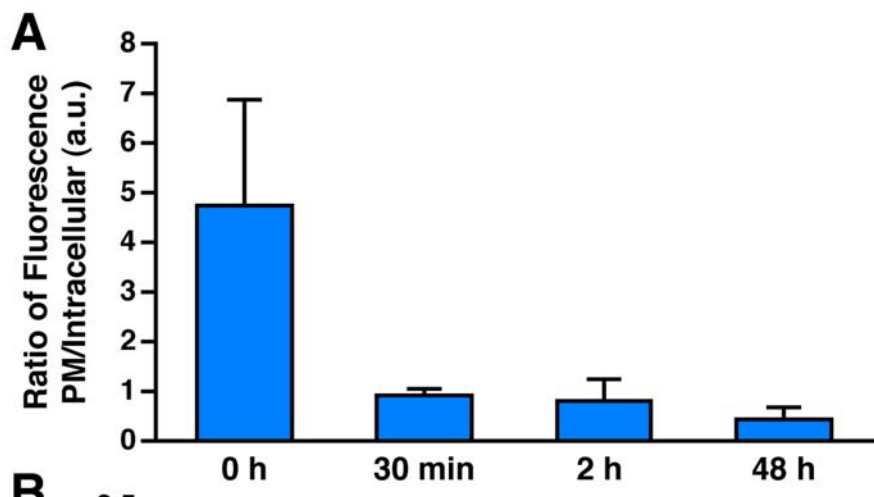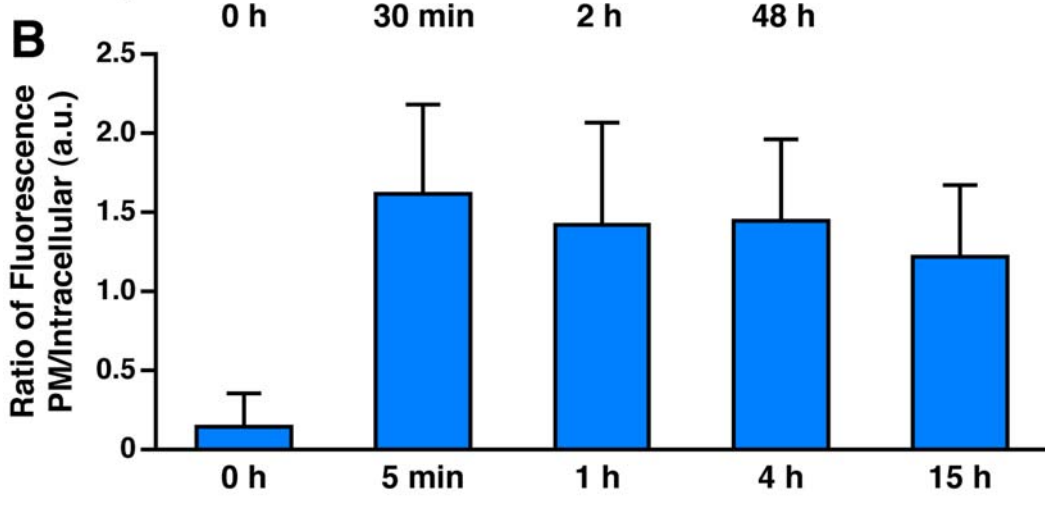

Supplement: mbc_15_6_2684__4.pdf [file mbc_15_6_2684__4.pdf]
